# Supplementary material for: Zn-doped TiO2 electrodes in dye-sensitized solar cells for enhanced photocurrent
Source: Royal Society of Chemistry journal article supplement (doi:10.1039/c2jm32409a), 2012-01-01
Supplement: c2jm32409a.pdf [file c2jm32409a.pdf]

## Electronic Supplementary Information

### Zn-doped TiO<sub>2</sub> Electrodes in Dye-Sensitized Solar Cells for Enhanced Photocurrent

By Fuzhi Huang, Qi Li, Gordon J. Thorogood, Yi-Bing Cheng\* and Rachel A. Caruso\*

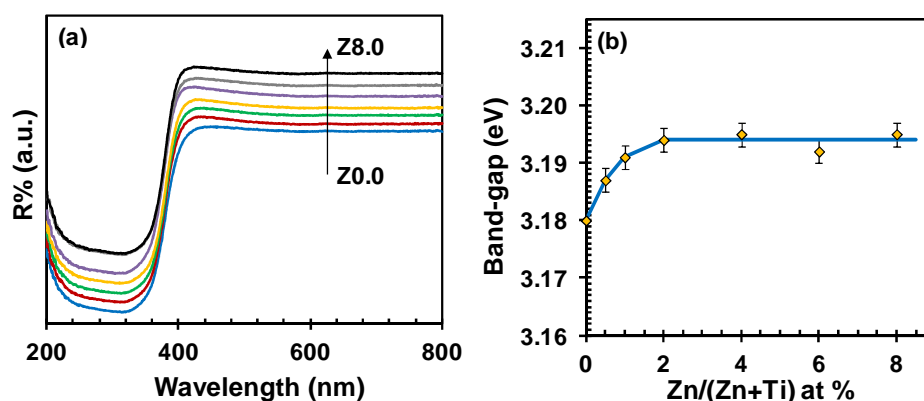

**Figure S11.** (a) UV-vis diffuse reflectance spectra of the prepared samples (offset by 5), from bottom to top: Z0.0, Z0.5, Z1.0, Z2.0, Z4.0, Z6.0, Z8.0), and (b) the band-gap calculated from (a).

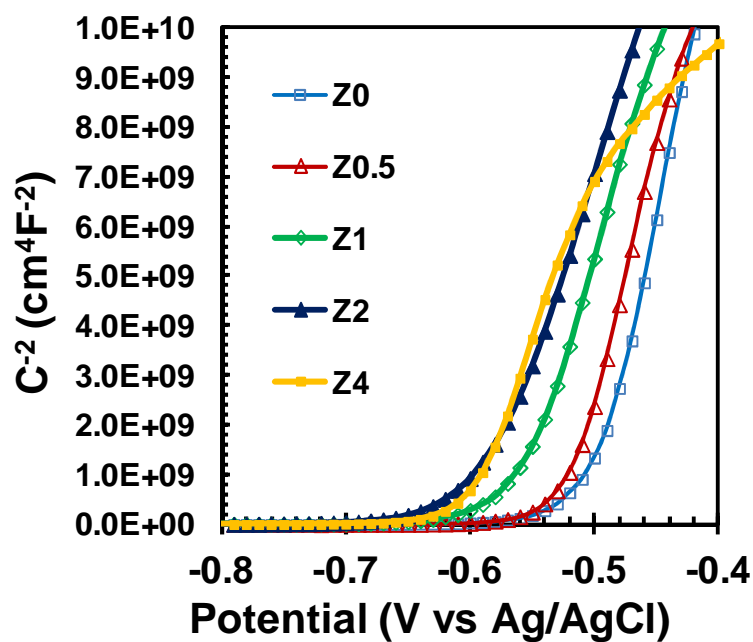

**Fig. S12** Mott-Schottky plots of the Z0, Z0.5, Z1, Z2 and Z4 samples.

**Table S1** The calculated  $E_{fb}$  and charge carrier (donor) density from Mott-Schottky plots (Figure SI2).

| Sample Name | Zn/(Zn+Ti) at % | $E_{fb}$ (eV vs Vacuum) | Charge Carrier Density ( $\text{cm}^{-3}$ ) |
|-------------|-----------------|-------------------------|---------------------------------------------|
| Z0          | 0               | -4.16                   | $2.36 \times 10^{19}$                       |
| Z0.5        | 0.5             | -4.14                   | $2.52 \times 10^{19}$                       |
| Z1          | 1               | -4.10                   | $3.20 \times 10^{19}$                       |
| Z2          | 2               | -4.05                   | $3.50 \times 10^{19}$                       |
| Z4          | 4               | -4.04                   | $3.57 \times 10^{19}$                       |

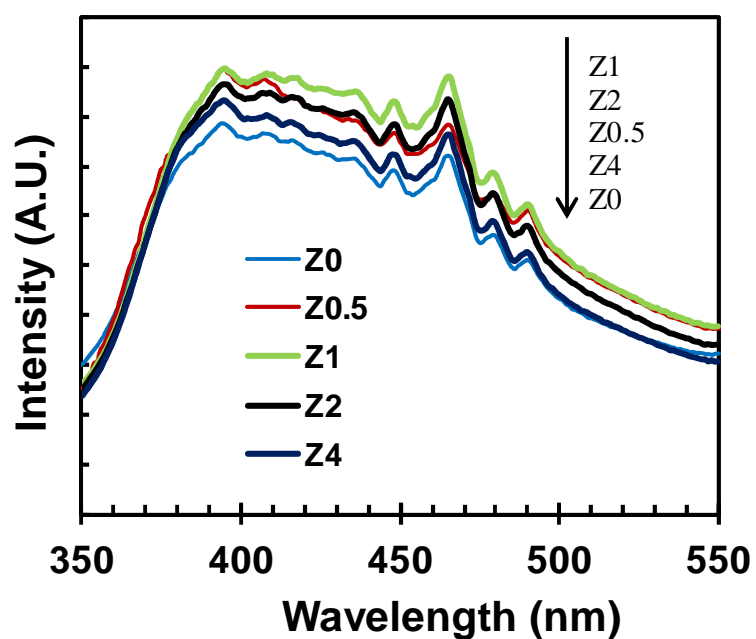

Fig. SI3 The photoluminescence spectra of Z0, Z0.5, Z1, Z2 and Z4 samples (Excited at 300nm).

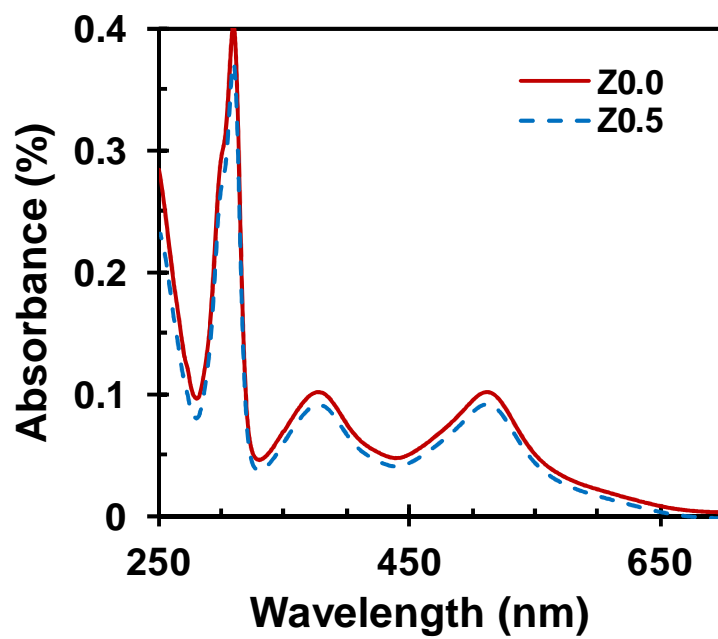

**Figure SI4.** UV-vis spectra of desorbed dye from the Z0.0 and Z0.5 samples.
